# Supplementary material
Source: PubMed Central journal article supplement (PMC4593754)

**Supplemental Figure 1.** Bubble plot of the proportion hydroxyapatite between the first and second stone composition among 308 common calcium stone formers. The proportion decreases more in stone formers with a high proportion of hydroxyapatite at first stone composition.

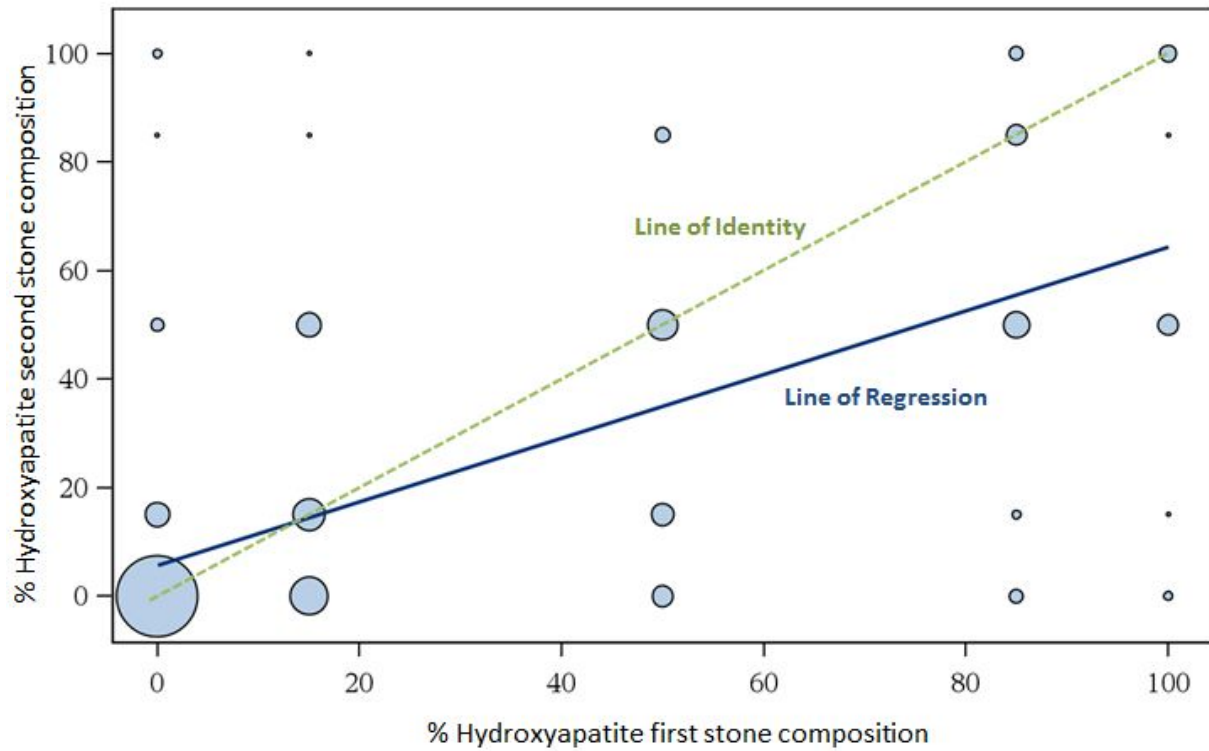

**Supplemental Figure 2.** The actual risk of symptomatic recurrence in struvite and brushite stone formers is more consistent with that estimated assigning the composition as uric acid (UA) rather than not UA with the Recurrence of Kidney Stone (ROKS) nomogram.<sup>14</sup> Because of this, the composition predictor variable in the ROKS nomogram was modified to “Brushite, struvite, or uric acid composition?” rather than to “Uric acid composition?”

<http://www.gxmd.com/calculate-online/nephrology/recurrence-of-kidney-stone-roks>

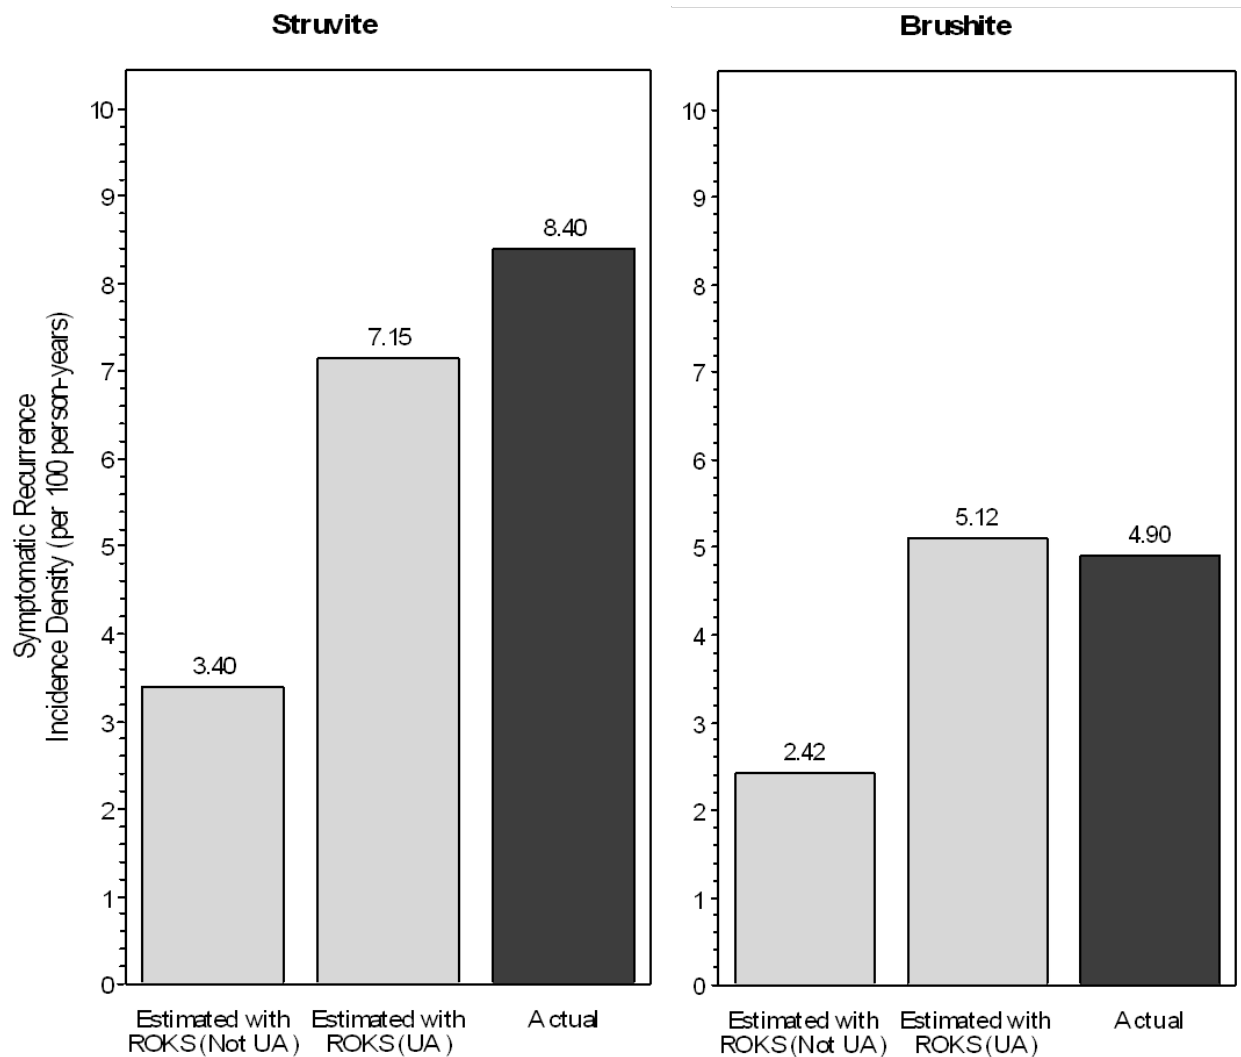

Supplement: NIHMS714457-supplement-1.pdf [file NIHMS714457-supplement-1.pdf]
